# Supplementary material for: Partition analysis of dipole moments in solution applied to functional groups in polypeptide motifs
Source: Royal Society of Chemistry journal article supplement (doi:10.1039/d4cp01654h), 2024-01-01
Supplement: d4cp01654h1.pdf [file d4cp01654h1.pdf]

*Supplementary Information for*

Partition analysis of dipole moments in solution applied to functional groups in  
polypeptide motifs

*Dmitri G. Fedorov*\*

Research Center for Computational Design of Advanced Functional Materials  
(CD-FMat), National Institute of Advanced Industrial Science and Technology (AIST),  
Central 2, Umezono 1-1-1, Tsukuba, 305-8568, Japan.

\* Corresponding author

**Table S1. Coordinates for  $\alpha$ -(Ala)<sub>10</sub>.**

| atom | x         | y         | z         |
|------|-----------|-----------|-----------|
| H    | 0.089480  | 0.269339  | -0.153996 |
| C    | -0.076694 | 1.341304  | -0.096417 |
| H    | 0.839990  | 1.862725  | -0.355924 |
| H    | -0.827347 | 1.604084  | -0.840450 |
| C    | -0.550254 | 1.760937  | 1.266233  |
| O    | -0.346667 | 2.925556  | 1.705171  |
| N    | -1.201491 | 0.853696  | 2.042608  |
| H    | -1.447803 | -0.057880 | 1.654894  |
| C    | -1.903564 | 1.277190  | 3.269700  |
| H    | -2.807157 | 1.848234  | 2.981490  |
| C    | -0.990114 | 2.204989  | 4.121585  |
| O    | -1.358717 | 3.348366  | 4.475239  |
| C    | -2.338492 | 0.035495  | 4.048259  |
| H    | -2.894715 | 0.319969  | 4.935883  |
| H    | -2.974145 | -0.596273 | 3.433667  |
| H    | -1.478422 | -0.553022 | 4.359901  |
| N    | 0.197334  | 1.673438  | 4.523492  |
| H    | 0.437366  | 0.734610  | 4.201181  |
| C    | 1.221248  | 2.404833  | 5.281706  |
| H    | 0.925946  | 2.449934  | 6.344958  |
| C    | 1.393304  | 3.847673  | 4.757697  |
| O    | 1.479907  | 4.824834  | 5.537462  |
| C    | 2.543579  | 1.636549  | 5.158504  |
| H    | 3.323156  | 2.125104  | 5.734674  |
| H    | 2.429866  | 0.620971  | 5.528693  |
| H    | 2.865982  | 1.587189  | 4.120936  |
| N    | 1.588827  | 3.967865  | 3.418679  |
| H    | 1.327871  | 3.178493  | 2.818453  |
| C    | 1.688162  | 5.273033  | 2.750692  |
| H    | 2.558092  | 5.803122  | 3.171765  |
| C    | 0.439673  | 6.139660  | 2.990264  |
| O    | 0.540566  | 7.309985  | 3.435084  |
| C    | 1.901504  | 5.055304  | 1.248510  |
| H    | 1.967694  | 6.008395  | 0.732781  |
| H    | 2.822137  | 4.505865  | 1.070378  |
| H    | 1.076972  | 4.483997  | 0.825812  |
| N    | -0.758473 | 5.611905  | 2.646209  |
| H    | -0.812460 | 4.622183  | 2.362980  |
| C    | -2.000609 | 6.365109  | 2.854310  |
| H    | -2.048284 | 7.178509  | 2.109492  |
| C    | -2.014596 | 7.000520  | 4.259351  |
| O    | -2.270335 | 8.213865  | 4.448388  |
| C    | -3.198687 | 5.432241  | 2.653528  |
| H    | -4.131411 | 5.962743  | 2.817732  |
| H    | -3.203465 | 5.035391  | 1.641642  |

|   |           |           |           |
|---|-----------|-----------|-----------|
| H | -3.148504 | 4.591679  | 3.343661  |
| N | -1.780251 | 6.119473  | 5.262717  |
| H | -1.549828 | 5.152063  | 5.011747  |
| C | -1.727120 | 6.465671  | 6.683697  |
| H | -2.724317 | 6.809684  | 7.006633  |
| C | -0.722212 | 7.607161  | 6.947914  |
| O | -1.082925 | 8.713491  | 7.419374  |
| C | -1.343961 | 5.197091  | 7.453572  |
| H | -1.275385 | 5.393874  | 8.519287  |
| H | -2.089831 | 4.422375  | 7.295043  |
| H | -0.384596 | 4.813903  | 7.108481  |
| N | 0.581676  | 7.331569  | 6.701713  |
| H | 0.837344  | 6.444714  | 6.250176  |
| C | 1.647692  | 8.315970  | 6.917398  |
| H | 1.819808  | 8.438846  | 7.999869  |
| C | 1.246267  | 9.681315  | 6.324242  |
| O | 1.320697  | 10.749220 | 6.980787  |
| C | 2.916267  | 7.785904  | 6.240991  |
| H | 3.742406  | 8.479987  | 6.362653  |
| H | 3.202455  | 6.830203  | 6.672510  |
| H | 2.745143  | 7.634235  | 5.176828  |
| N | 0.887205  | 9.662795  | 5.014961  |
| H | 0.773037  | 8.765254  | 4.530093  |
| C | 0.452138  | 10.875188 | 4.318468  |
| H | 1.308602  | 11.565521 | 4.235536  |
| C | -0.638283 | 11.585957 | 5.131809  |
| O | -0.533770 | 12.801760 | 5.438991  |
| C | -0.045078 | 10.506233 | 2.917426  |
| H | -0.388117 | 11.388441 | 2.385684  |
| H | 0.753324  | 10.045115 | 2.342275  |
| H | -0.866428 | 9.794285  | 2.982194  |
| N | -1.717210 | 10.855493 | 5.494710  |
| H | -1.768389 | 9.851799  | 5.274156  |
| C | -2.805706 | 11.449189 | 6.272729  |
| H | -3.315564 | 12.207618 | 5.655875  |
| C | -2.264611 | 12.156525 | 7.533494  |
| O | -2.669560 | 13.295078 | 7.869173  |
| C | -3.797779 | 10.351691 | 6.661099  |
| H | -4.614232 | 10.759655 | 7.249552  |
| H | -4.212841 | 9.884349  | 5.771179  |
| H | -3.296765 | 9.579972  | 7.242036  |
| N | -1.379842 | 11.466321 | 8.297906  |
| H | -1.003673 | 10.576158 | 7.950168  |
| C | -0.718405 | 12.092938 | 9.444767  |
| H | -1.481213 | 12.312659 | 10.209962 |
| C | -0.048918 | 13.432594 | 9.089582  |
| O | -0.050885 | 14.381485 | 9.909250  |

|   |           |           |           |
|---|-----------|-----------|-----------|
| C | 0.290297  | 11.101307 | 10.032436 |
| H | 0.804473  | 11.535583 | 10.884899 |
| H | -0.218864 | 10.198597 | 10.359975 |
| H | 1.027498  | 10.822582 | 9.281836  |
| N | 0.566970  | 13.532492 | 7.885911  |
| H | 0.562314  | 12.739712 | 7.232317  |
| C | 1.168925  | 14.793223 | 7.443430  |
| H | 1.681643  | 15.244119 | 8.308898  |
| C | 0.120465  | 15.826445 | 6.958769  |
| O | 0.411699  | 17.050423 | 6.951766  |
| C | 2.182991  | 14.513793 | 6.337576  |
| H | 2.614976  | 15.441832 | 5.976331  |
| H | 2.984181  | 13.876768 | 6.703072  |
| H | 1.701017  | 14.005444 | 5.504848  |
| N | -1.081176 | 15.371890 | 6.536151  |
| H | -1.284280 | 14.372558 | 6.581186  |
| C | -2.162902 | 16.255932 | 6.163732  |
| H | -1.810856 | 17.284739 | 6.218489  |
| H | -2.507346 | 16.051335 | 5.144067  |
| H | -3.018639 | 16.131392 | 6.836570  |

**Table S2. Coordinates for extended-(Ala)<sub>10</sub>.**

| atom | x         | y         | z         |
|------|-----------|-----------|-----------|
| H    | -0.422035 | -0.171698 | -0.279294 |
| C    | 0.050425  | 0.782513  | -0.063577 |
| H    | 1.085316  | 0.585665  | 0.211746  |
| H    | 0.058837  | 1.386550  | -0.964874 |
| C    | -0.650222 | 1.511432  | 1.063609  |
| O    | -0.690210 | 2.762513  | 1.120772  |
| N    | -1.197019 | 0.732978  | 2.038475  |
| H    | -1.159348 | -0.289477 | 1.990146  |
| C    | -1.878728 | 1.260293  | 3.221940  |
| H    | -1.169153 | 1.899270  | 3.784799  |
| C    | -2.283299 | 0.039121  | 4.095353  |
| O    | -2.040945 | -1.125306 | 3.704089  |
| C    | -3.085745 | 2.136579  | 2.846712  |
| H    | -3.547876 | 2.548815  | 3.740138  |
| H    | -2.760571 | 2.956683  | 2.212974  |
| H    | -3.832927 | 1.559603  | 2.308695  |
| N    | -2.901108 | 0.289522  | 5.275718  |
| H    | -3.068303 | 1.256125  | 5.585749  |
| C    | -3.377580 | -0.723663 | 6.214556  |
| H    | -4.082908 | -1.389219 | 5.681994  |
| C    | -4.121774 | -0.014151 | 7.377850  |
| O    | -4.152049 | 1.233690  | 7.443606  |
| C    | -2.221279 | -1.602745 | 6.733223  |
| H    | -2.598591 | -2.381774 | 7.391400  |

|   |            |           |           |
|---|------------|-----------|-----------|
| H | -1.710564  | -2.072717 | 5.897183  |
| H | -1.499533  | -1.007127 | 7.286137  |
| N | -4.760171  | -0.839551 | 8.242070  |
| H | -4.705283  | -1.861203 | 8.111947  |
| C | -5.546402  | -0.461463 | 9.412216  |
| H | -4.913561  | 0.155492  | 10.078917 |
| C | -5.939470  | -1.771223 | 10.153732 |
| O | -5.658414  | -2.880458 | 9.649589  |
| C | -6.769040  | 0.389465  | 9.034224  |
| H | -7.309360  | 0.698262  | 9.925524  |
| H | -6.447952  | 1.279267  | 8.499429  |
| H | -7.450519  | -0.166627 | 8.395774  |
| N | -6.549394  | -1.630287 | 11.352765 |
| H | -6.751800  | -0.691852 | 11.732202 |
| C | -7.047219  | -2.707299 | 12.207655 |
| H | -7.781098  | -3.304788 | 11.633664 |
| C | -7.768039  | -2.026501 | 13.407063 |
| O | -7.811270  | -0.777936 | 13.464998 |
| C | -5.914648  | -3.656058 | 12.635769 |
| H | -6.305494  | -4.475331 | 13.234461 |
| H | -5.431561  | -4.070997 | 11.755280 |
| H | -5.166587  | -3.129571 | 13.222871 |
| N | -8.306876  | -2.835127 | 14.351946 |
| H | -8.279268  | -3.859151 | 14.237313 |
| C | -9.131517  | -2.407628 | 15.482025 |
| H | -8.509804  | -1.781210 | 16.151249 |
| C | -9.558390  | -3.685586 | 16.260178 |
| O | -9.297213  | -4.816016 | 15.793854 |
| C | -10.324465 | -1.543028 | 15.043813 |
| H | -10.892253 | -1.216193 | 15.911212 |
| H | -9.969234  | -0.665768 | 14.510276 |
| H | -10.990375 | -2.097823 | 14.387874 |
| N | -10.174090 | -3.496426 | 17.450850 |
| H | -10.341325 | -2.542026 | 17.803489 |
| C | -10.600113 | -4.535705 | 18.384952 |
| H | -11.313861 | -5.204898 | 17.868022 |
| C | -11.318912 | -3.832925 | 19.570979 |
| O | -11.356091 | -2.583967 | 19.624497 |
| C | -9.410116  | -5.398710 | 18.842338 |
| H | -9.745474  | -6.198729 | 19.497951 |
| H | -8.923598  | -5.841669 | 17.977487 |
| H | -8.679023  | -4.799672 | 19.378971 |
| N | -11.852900 | -4.645299 | 20.513620 |
| H | -11.805434 | -5.670437 | 20.402192 |
| C | -12.584774 | -4.244259 | 21.711066 |
| H | -11.917014 | -3.640019 | 22.354646 |
| C | -12.979800 | -5.549521 | 22.460557 |

|   |            |           |           |
|---|------------|-----------|-----------|
| O | -12.703713 | -6.659496 | 21.954984 |
| C | -13.806831 | -3.374180 | 21.368458 |
| H | -14.316578 | -3.057758 | 22.275157 |
| H | -13.489345 | -2.489412 | 20.823189 |
| H | -14.513757 | -3.922525 | 20.751363 |
| N | -13.578356 | -5.407522 | 23.664828 |
| H | -13.777795 | -4.468558 | 24.044742 |
| C | -14.073111 | -6.482914 | 24.523678 |
| H | -14.807538 | -7.082847 | 23.953192 |
| C | -14.792009 | -5.798496 | 25.721530 |
| O | -14.832905 | -4.549757 | 25.777108 |
| C | -12.939552 | -7.429355 | 24.954358 |
| H | -13.329002 | -8.244811 | 25.558631 |
| H | -12.458979 | -7.849494 | 24.074966 |
| H | -12.189894 | -6.899493 | 25.536215 |
| N | -15.333509 | -6.602125 | 26.670130 |
| H | -15.309373 | -7.624775 | 26.559010 |
| C | -16.150574 | -6.154577 | 27.797855 |
| H | -15.523401 | -5.517288 | 28.450599 |
| C | -16.591459 | -7.390878 | 28.604978 |
| O | -16.356650 | -8.544008 | 28.183259 |
| C | -17.344839 | -5.294761 | 27.349531 |
| H | -17.903381 | -4.944007 | 28.213419 |
| H | -16.989389 | -4.433055 | 26.791733 |
| H | -18.018252 | -5.863247 | 26.713422 |
| N | -17.215018 | -7.151507 | 29.783446 |
| H | -17.354276 | -6.195038 | 30.123662 |
| C | -17.631517 | -8.199468 | 30.714813 |
| H | -18.357446 | -8.863684 | 30.209516 |
| C | -18.336241 | -7.498698 | 31.887598 |
| O | -18.378814 | -6.247916 | 31.947401 |
| C | -16.442799 | -9.055974 | 31.180444 |
| H | -16.780317 | -9.845399 | 31.845996 |
| H | -15.959433 | -9.509858 | 30.320040 |
| H | -15.711948 | -8.449411 | 31.707606 |
| N | -18.876754 | -8.291704 | 32.847248 |
| H | -18.833339 | -9.304648 | 32.746222 |
| C | -19.559786 | -7.756243 | 34.007072 |
| H | -19.527281 | -6.669687 | 33.954830 |
| H | -20.604257 | -8.083145 | 34.033956 |
| H | -19.078036 | -8.086716 | 34.932806 |

**Table S3. Coordinates for  $\beta$ -(Ala)<sub>10</sub>.**

| atom | x         | y        | z         |
|------|-----------|----------|-----------|
| C    | -0.812969 | 2.510062 | 0.511889  |
| H    | 0.197950  | 2.838490 | 0.743432  |
| H    | -1.115812 | 3.020046 | -0.398797 |

|   |           |           |           |
|---|-----------|-----------|-----------|
| H | -0.793055 | 1.441032  | 0.323761  |
| C | -1.739460 | 2.864479  | 1.647763  |
| O | -1.979403 | 4.064741  | 1.955217  |
| N | -2.266813 | 1.851454  | 2.375000  |
| H | -2.091347 | 0.869046  | 2.149684  |
| C | -3.143603 | 2.090558  | 3.522933  |
| H | -2.671349 | 2.852024  | 4.172973  |
| C | -3.279983 | 0.749229  | 4.282572  |
| O | -2.965565 | -0.327339 | 3.720926  |
| C | -4.504501 | 2.651066  | 3.083314  |
| H | -5.092741 | 2.925779  | 3.954730  |
| H | -4.355742 | 3.534970  | 2.469866  |
| H | -5.060992 | 1.918599  | 2.504279  |
| N | -3.741294 | 0.791092  | 5.554266  |
| H | -3.982089 | 1.687544  | 6.003614  |
| C | -3.863076 | -0.397943 | 6.398044  |
| H | -4.356504 | -1.187203 | 5.803667  |
| C | -4.708875 | -0.049184 | 7.644974  |
| O | -4.929808 | 1.147318  | 7.948239  |
| C | -2.474230 | -0.929357 | 6.802539  |
| H | -2.569063 | -1.831143 | 7.402431  |
| H | -1.895600 | -1.164266 | 5.913395  |
| H | -1.929317 | -0.188532 | 7.381695  |
| N | -5.188572 | -1.092127 | 8.358947  |
| H | -4.959532 | -2.056769 | 8.088501  |
| C | -5.938699 | -0.964827 | 9.609534  |
| H | -5.482073 | -0.153918 | 10.205202 |
| C | -5.868820 | -2.303322 | 10.382251 |
| O | -5.554349 | -3.360568 | 9.788577  |
| C | -7.407198 | -0.582395 | 9.336241  |
| H | -7.932133 | -0.410448 | 10.272317 |
| H | -7.450258 | 0.325384  | 8.740623  |
| H | -7.917792 | -1.373418 | 8.793250  |
| N | -6.157833 | -2.250941 | 11.700386 |
| H | -6.439368 | -1.359437 | 12.139096 |
| C | -6.217961 | -3.412239 | 12.582208 |
| H | -6.684803 | -4.237725 | 12.014350 |
| C | -7.096765 | -3.055943 | 13.796223 |
| O | -7.567955 | -1.903363 | 13.924376 |
| C | -4.811586 | -3.890429 | 12.989505 |
| H | -4.871519 | -4.785781 | 13.602427 |
| H | -4.232069 | -4.120881 | 12.100207 |
| H | -4.285286 | -3.123354 | 13.552284 |
| N | -7.316561 | -4.032213 | 14.716543 |
| H | -6.985457 | -4.980209 | 14.527182 |
| C | -8.255754 | -3.855053 | 15.830415 |
| H | -9.281975 | -4.033795 | 15.461096 |

|   |           |           |           |
|---|-----------|-----------|-----------|
| C | -8.217877 | -2.416453 | 16.400772 |
| O | -9.273552 | -1.807899 | 16.672706 |
| C | -7.957940 | -4.886082 | 16.925955 |
| H | -8.678193 | -4.799792 | 17.733281 |
| H | -8.012701 | -5.893953 | 16.523189 |
| H | -6.962855 | -4.739524 | 17.339516 |
| N | -6.990103 | -1.879023 | 16.644579 |
| H | -6.160575 | -2.442356 | 16.449931 |
| C | -6.805172 | -0.607122 | 17.335826 |
| H | -7.839674 | -0.239695 | 17.478011 |
| C | -6.037657 | 0.538945  | 16.602773 |
| O | -5.499117 | 1.431565  | 17.292283 |
| C | -6.238550 | -0.837793 | 18.747074 |
| H | -6.093468 | 0.115172  | 19.246627 |
| H | -6.919487 | -1.446647 | 19.334146 |
| H | -5.278461 | -1.346732 | 18.703882 |
| N | -6.035726 | 0.577575  | 15.240884 |
| H | -6.482480 | -0.166078 | 14.684787 |
| C | -5.311216 | 1.608520  | 14.480544 |
| H | -5.624419 | 2.596405  | 14.864886 |
| C | -5.610582 | 1.516007  | 12.959127 |
| O | -6.220952 | 0.533254  | 12.477693 |
| C | -3.789917 | 1.484362  | 14.720762 |
| H | -3.252858 | 2.271790  | 14.197273 |
| H | -3.573771 | 1.564674  | 15.782718 |
| H | -3.422097 | 0.524710  | 14.365657 |
| N | -5.136978 | 2.518590  | 12.181674 |
| H | -4.652301 | 3.325723  | 12.599020 |
| C | -5.228563 | 2.564273  | 10.721629 |
| H | -4.812492 | 1.624569  | 10.309210 |
| C | -4.414632 | 3.782640  | 10.213351 |
| O | -4.026282 | 4.653960  | 11.025728 |
| C | -6.694971 | 2.660739  | 10.251002 |
| H | -6.746260 | 2.569246  | 9.169594  |
| H | -7.279169 | 1.861447  | 10.698368 |
| H | -7.134558 | 3.612087  | 10.540984 |
| N | -4.195284 | 3.864718  | 8.879017  |
| H | -4.490638 | 3.097234  | 8.256498  |
| C | -3.437159 | 4.938701  | 8.233711  |
| H | -3.909120 | 5.903159  | 8.499485  |
| C | -3.462037 | 4.770412  | 6.702285  |
| O | -3.960574 | 3.750988  | 6.168543  |
| C | -1.991082 | 4.981568  | 8.767041  |
| H | -1.437835 | 5.801192  | 8.314434  |
| H | -2.001569 | 5.122747  | 9.844083  |
| H | -1.470488 | 4.053526  | 8.545576  |
| N | -2.924113 | 5.782416  | 5.982095  |

|   |           |          |          |
|---|-----------|----------|----------|
| H | -2.481397 | 6.582908 | 6.443237 |
| C | -2.760798 | 5.728244 | 4.528865 |
| H | -2.433860 | 4.711013 | 4.248873 |
| C | -1.655222 | 6.724735 | 4.141994 |
| O | -1.269595 | 7.598796 | 4.956763 |
| C | -4.074199 | 6.019649 | 3.787437 |
| H | -3.937402 | 5.880798 | 2.718686 |
| H | -4.848415 | 5.338887 | 4.130407 |
| H | -4.408081 | 7.038257 | 3.967023 |
| N | -1.163450 | 6.627878 | 2.883780 |
| H | -1.444261 | 5.824126 | 2.308218 |
| C | -0.078757 | 7.461326 | 2.407955 |
| H | 0.866498  | 6.906771 | 2.368348 |
| H | -0.293191 | 7.833255 | 1.402598 |
| H | 0.038667  | 8.305949 | 3.085414 |
